# Supplementary material for: Genome-Wide Analysis of PR-1 Genes From Piper Nigrum Reveals Critical Role in Defense Response During Phytophthora Capsici Infection
Source: Research Square preprint supplement (doi:10.21203/rs.3.rs-130603/v1), 2020-12-30
Supplement: Supplementary file 1 [file d9ea64fc6686a28aab950bde.docx]

**Genome-wide analysis of *PR-1* genes from *Piper nigrum* reveals critical role in defense response during *Phytophthora capsici* infection**

**Kattupalli Divya**#**, Srinivasan Asha**#**, Eppurathu Vasudevan Soniya***🖂

**Supplementary Figures**


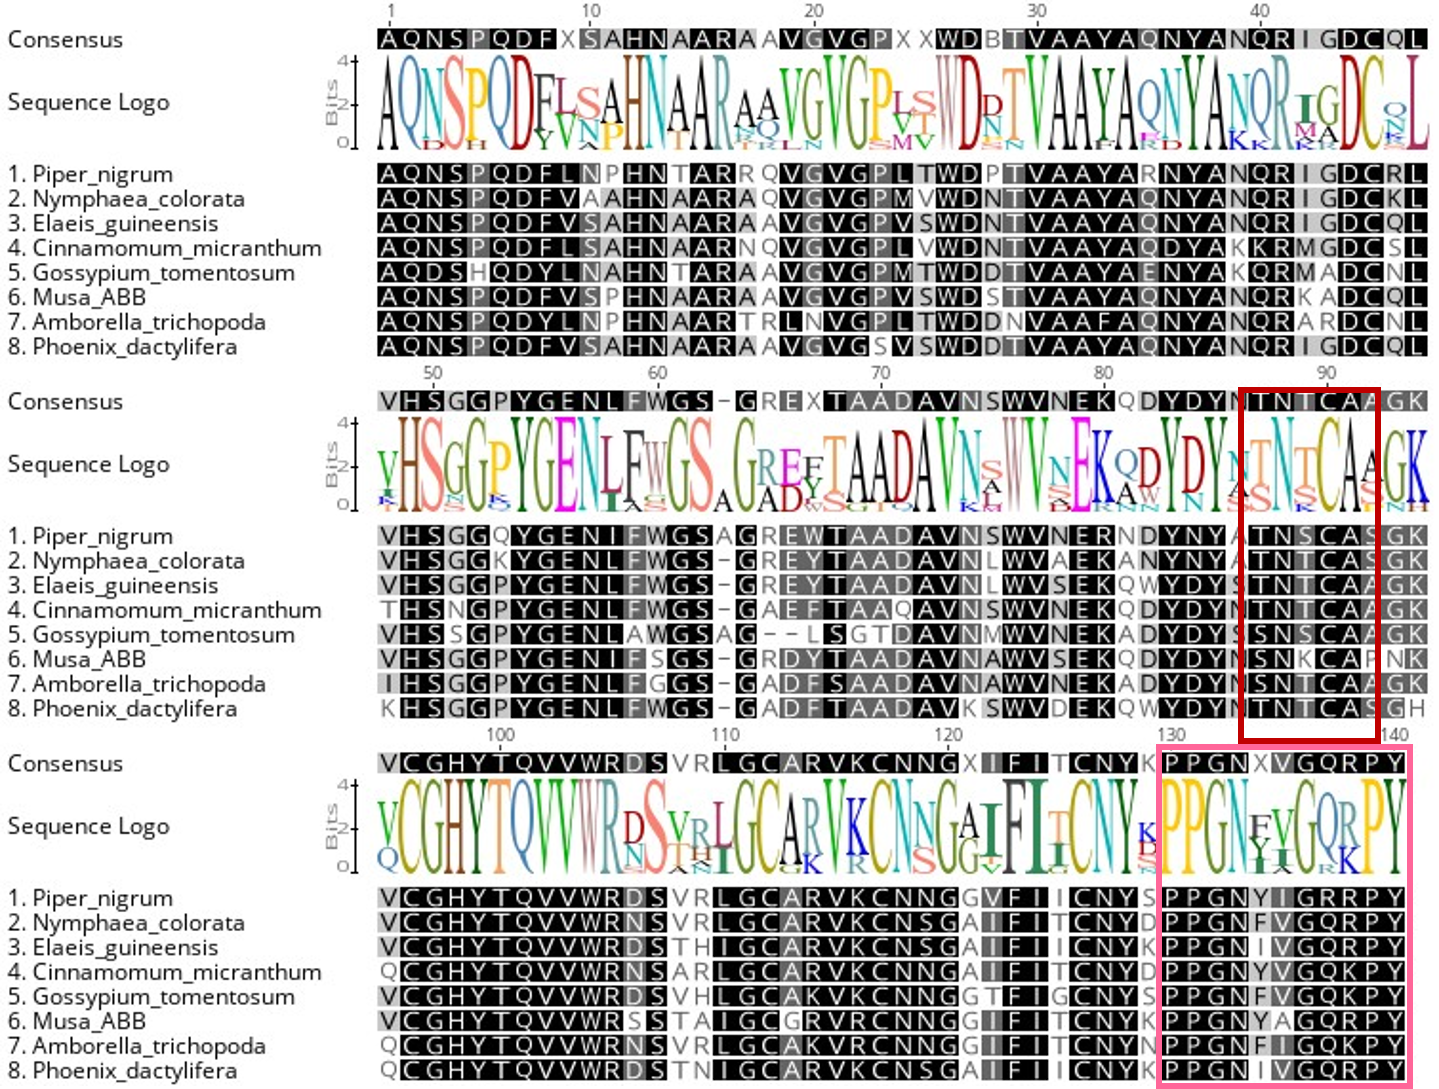


**Fig. S1:** The amino acid sequences from *Piper nigrum, Nymphaea colorata, Elaeis guineensis, Cinnamomum micranthum, Gossypium tomentosum, Musa ABB, Amborella trichopoda and Phoenix dactylifera* were aligned using Geneious bioinformatic software (https://www.geneious.com/) with default settings. The conserved domains are highlighted in different colours. CAP domain structure with caveolin-binding motif (CBM) and CAP-derived peptide (CAPE) are shown in red and pink boxes.


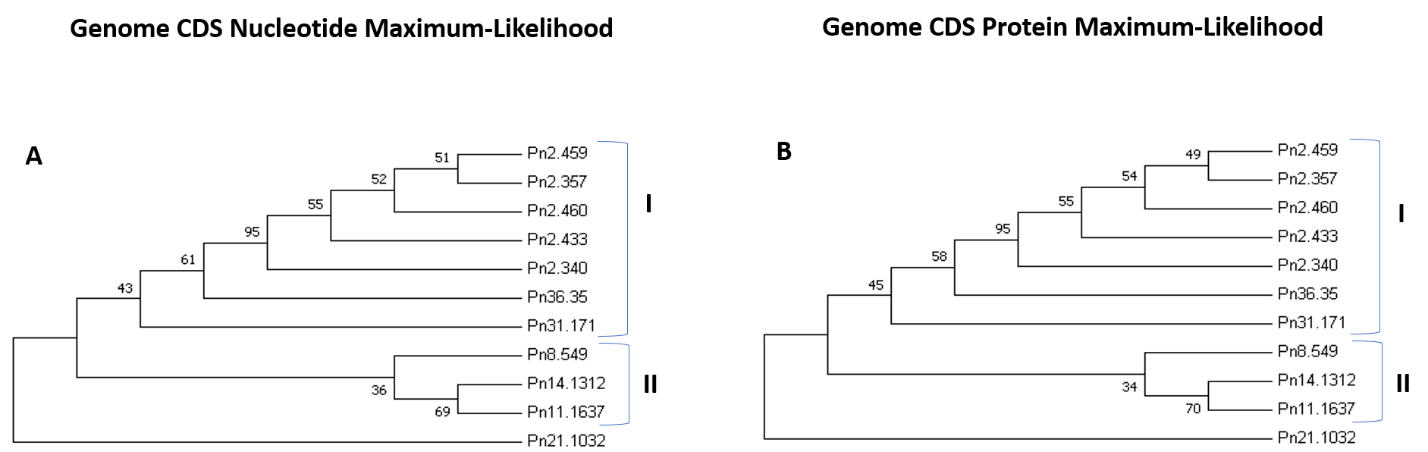


**Fig. S2: (A&B)** Phylogenetic analyses of *Piper nigrum PR-1* nucleotide and protein sequences. The phylogenetic tree was constructed using MEGA 7.0. by the maximum-likelihood (ML) method with 1000 bootstrap replicates and default parameters. The *PnPR-1* family genes were divided into two major groups, groups I and II.


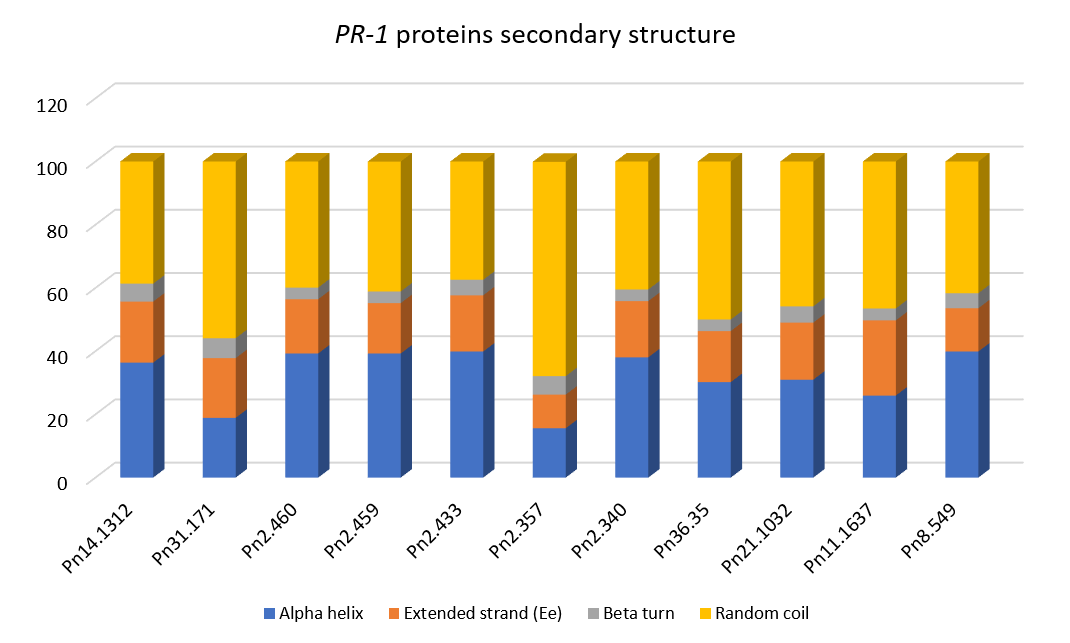


**Fig. S3:** Details of predicted **s**econdary structure of *PnPR-1* proteins.


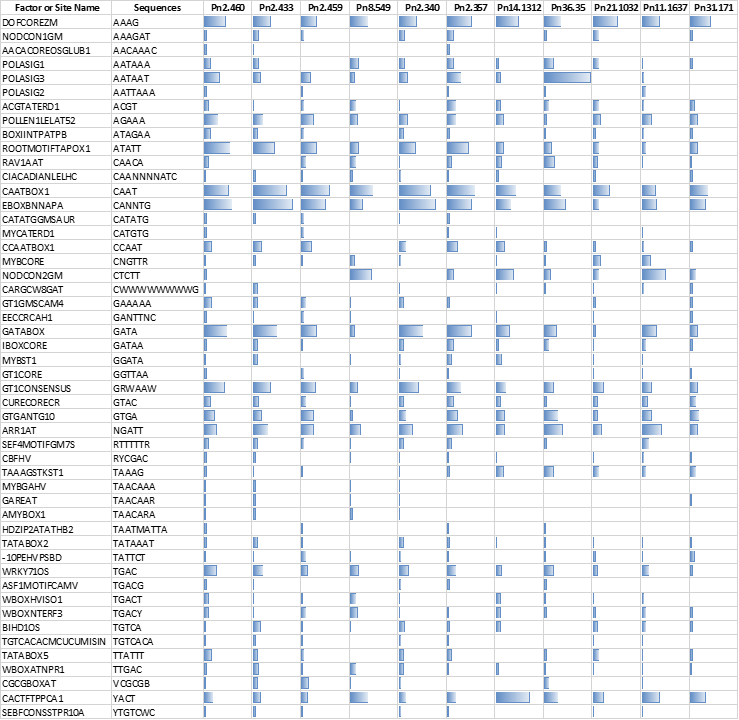


**Fig. S4**: Analysis of *cis*-acting elements in *PnPR-1* promoters using the NewPlace online server. The number of elements in each gene were represented in data bars.
